# Supplementary material for: Extemporaneous Preparation of 20 mg/mL Ganciclovir in Artificial Tears in Comparison with Sterile Water for Ophthalmic Administration: Formulation and Stability Study
Source: MDPI journal article supplement (doi:10.3390/pharmaceutics15010208), 2023-01-06
Supplement: s1 [file s1]

*Supplementary materials*

# **Extemporaneous preparation of 2 mg/mL ganciclovir in artificial tears in comparison with sterile water for ophthalmic administration: Formulation and stability study**

Jiraporn Leanpolchareanchai <sup>1</sup>, Patamaporn Tangteerakoon <sup>2</sup>, Patcharin Supapsophon <sup>3</sup>, Somsiri Sukavatcharin <sup>4</sup>, Pornchai Simaraj <sup>4</sup>, Jiraphong Suksiriworapong <sup>1,\*</sup>

<sup>1</sup> Department of Pharmacy, Faculty of Pharmacy, Mahidol University, Bangkok 10400, Thailand

<sup>2</sup> Chemotherapy Pharmacy Unit, Drug Compounding Section, Pharmacy Department, Faculty of Medicine, Ramathibodi Hospital, Bangkok 10400, Thailand

<sup>3</sup> Pharmacy Services, Somdech Phra Debaratana Medical Center, Faculty of Medicine, Ramathibodi Hospital, Bangkok 10400, Thailand

<sup>4</sup> Department of Ophthalmology, Faculty of Medicine, Ramathibodi Hospital, Mahidol University, Bangkok 10400, Thailand

\* Correspondence: jiraphong.suk@mahidol.edu

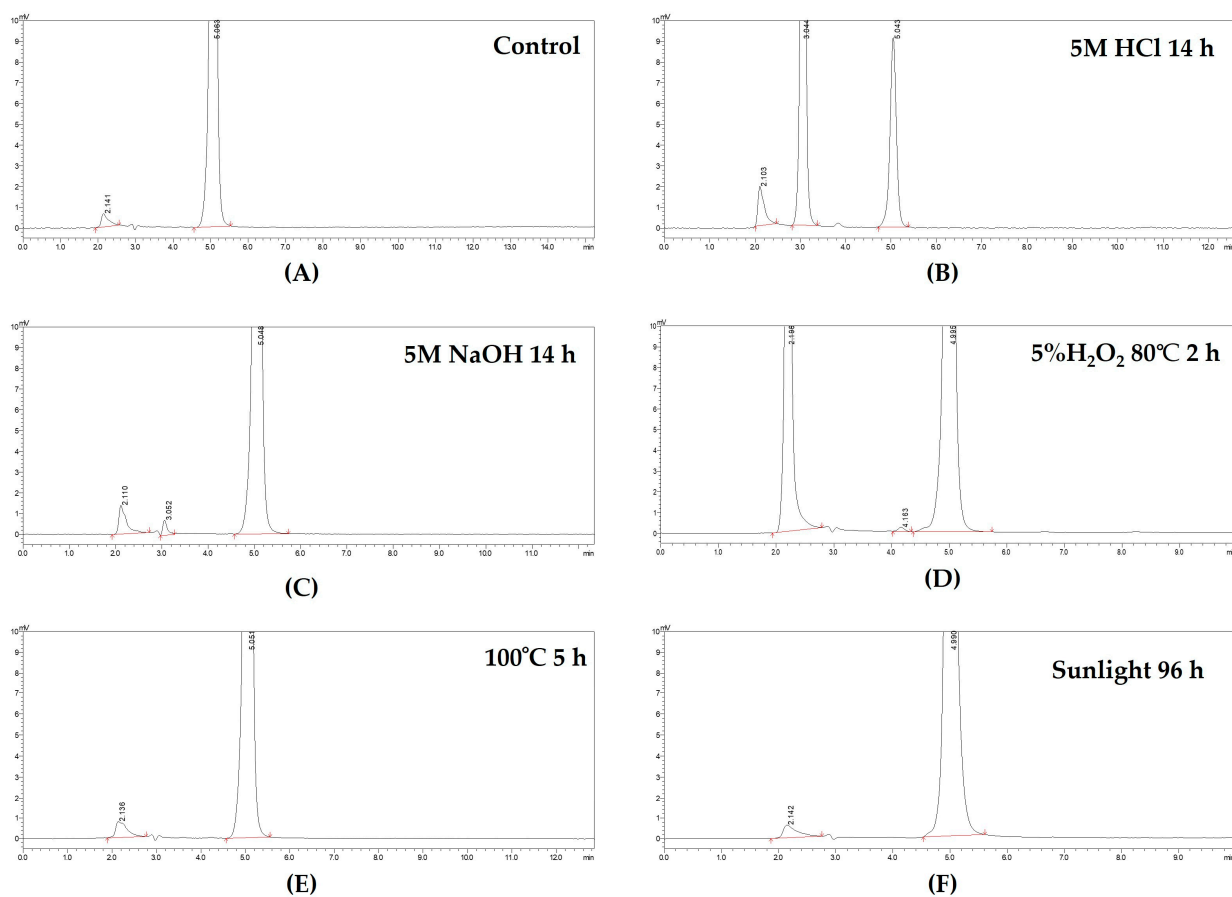

**Figure S1.** Enlarged views of HPLC chromatograms of ganciclovir standard after being subjected to the stress conditions. (A) control; (B) acid hydrolysis; (C) base hydrolysis; (D) oxidation; (E) heat degradation and (F) photolytic decomposition.

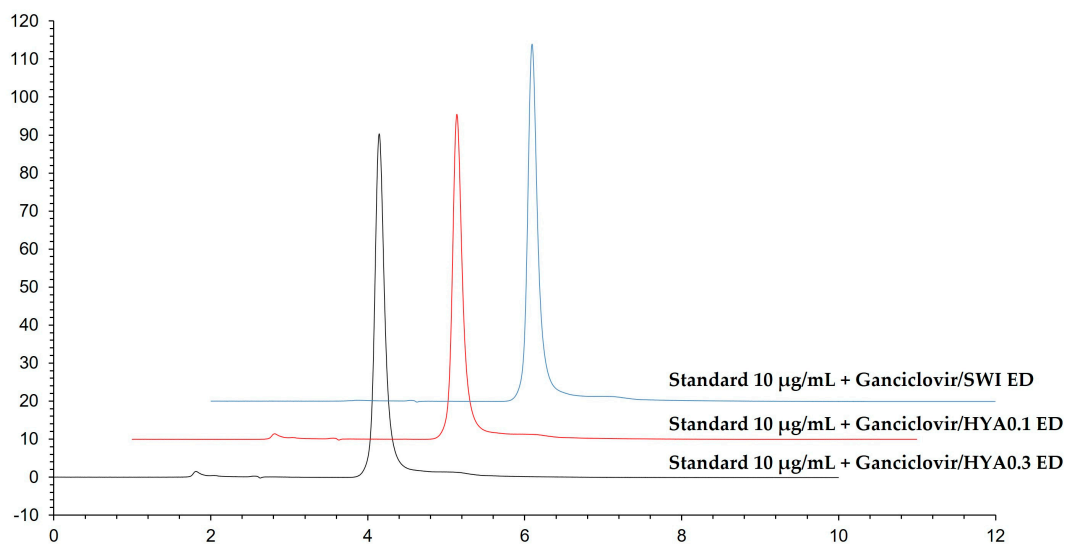

**Figure S2.** HPLC chromatograms of ganciclovir after extraction of the spiked drug from ganciclovir/SWI, ganciclovir/HYA0.1, and ganciclovir/HYA0.3 EDs.

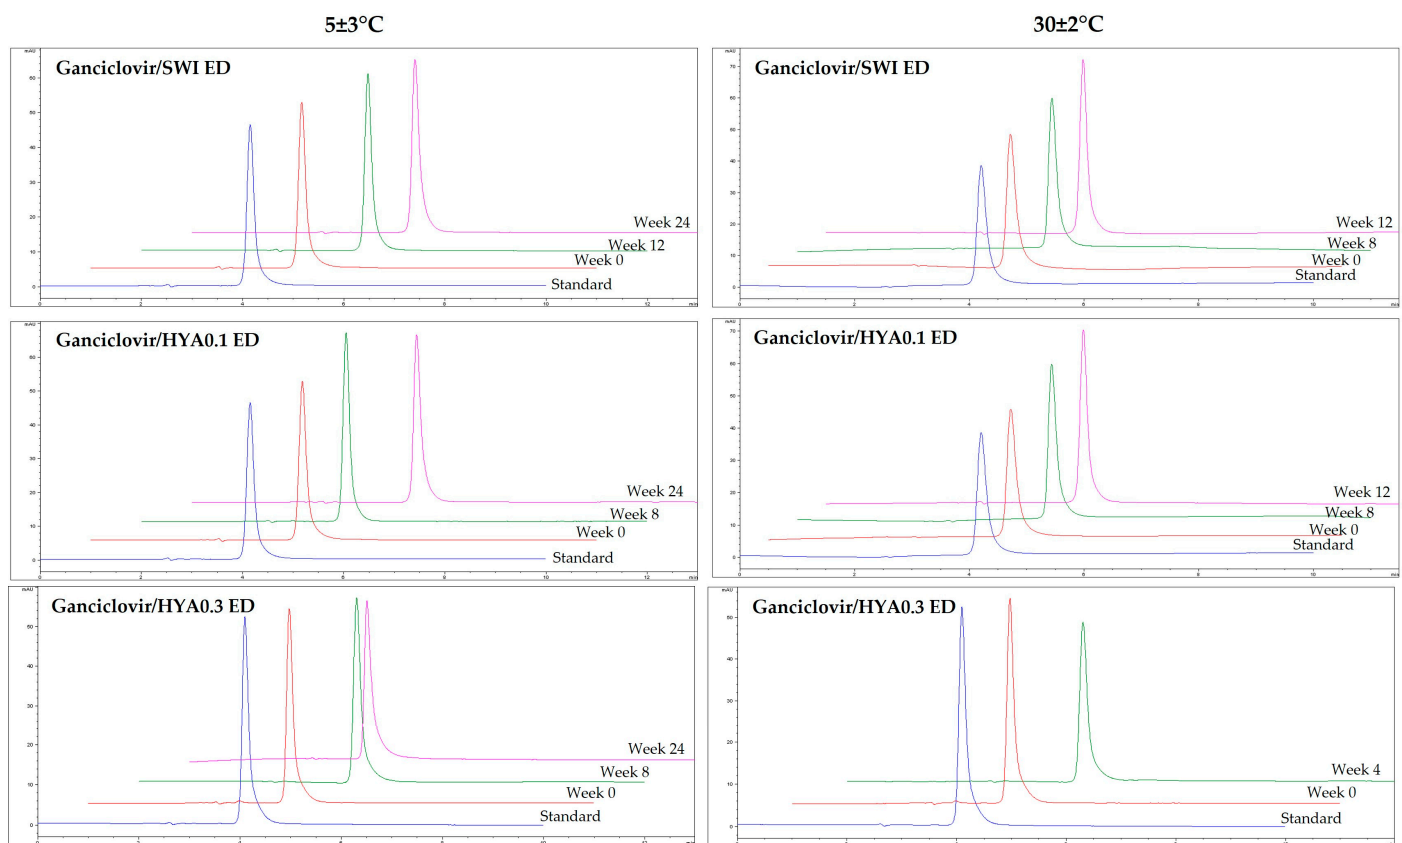

**Figure S3.** HPLC chromatograms of ganciclovir standard, ganciclovir/SWI ED, ganciclovir/HYA0.1 ED, and ganciclovir/HYA0.3 ED at the initial time (week 0), their shelf life (weeks 8 and 12), and the end of the study (weeks 24 and 12) when stored at  $5 \pm 3^\circ\text{C}$  (left panel) and at  $30 \pm 2^\circ\text{C}$  (right panel).
